# Supplementary material
Source: PubMed Central journal article supplement (PMC7255888)
Supplement: EMS86375-supplement-Title_page.pdf [file EMS86375-supplement-Title_page.pdf]

## **Use of Aspirin to Reduce Risk of Initial Vascular Events in Patients at Moderate Risk of Cardiovascular Disease (ARRIVE): A Randomised, Double-Blind, Placebo-Controlled Trial**

J Michael Gaziano <sup>1</sup>, Carlos Brotons <sup>2</sup>, Rosa Coppolecchia <sup>3</sup>, Claudio Cricelli <sup>4</sup>, Harald Darius <sup>5</sup>, Philip B Gorelick <sup>6</sup>, George Howard <sup>7</sup>, Thomas A Pearson <sup>8</sup>, Peter M Rothwell <sup>9</sup>, Luis Miguel Ruilope <sup>10</sup>, Michal Tendera <sup>11</sup>, Gianni Tognoni <sup>12</sup>, ARRIVE Executive Committee

<sup>1</sup>Brigham and Women's Hospital, Department of Medicine, Division of Aging, Boston, MA, USA; Harvard Medical School, Boston, MA, USA; VA Boston Healthcare System, Boston, MA, USA. Electronic address: jmgaziano@partners.org.

<sup>2</sup>Sardenya Primary Health Care Center, EAP Sardenya-Biomedical Research Institute Sant Pau (IIB Sant Pau), Barcelona, Spain.

<sup>3</sup>Bayer HealthCare LLC, Whippany, NJ, USA.

<sup>4</sup>Società Italiana di Medicina Generale, Florence, Italy.

<sup>5</sup>Department of Cardiology, Angiology, Nephrology and Intensive Care Medicine, Vivantes Neukoelln Medical Center, Berlin, Germany.

<sup>6</sup>Department of Translational Science & Molecular Medicine, Michigan State University College of Human Medicine, Grand Rapids, MI, USA; Vascular Neurology Program, Mercy Health Hauenstein Neurosciences, Grand Rapids, Michigan Grand Rapids, MI, USA.

<sup>7</sup>Department of Biostatistics, University of Alabama at Birmingham, Birmingham, AL, USA.

<sup>8</sup>Department of Epidemiology and Medicine, University of Florida Health Science Center, Gainesville, FL, USA.

<sup>9</sup>Nuffield Department of Clinical Neurosciences, University of Oxford, Oxford, UK.

<sup>10</sup>Internal Medicine, Complutense University, Head of the Hypertension Unit, 12 de Octubre Hospital, Madrid, Spain.

<sup>11</sup>Department of Cardiology and Structural Heart Disease, School of Medicine in Katowice, Medical University of Silesia, Katowice, Poland.

<sup>12</sup>IRCCS - Istituto di Ricerche Farmacologiche "Mario Negri", Department of Cardiovascular Research, IRCCS, Milan, Italy.
